# Supplementary material
Source: publisher figshare collection journal article supplement (https://tandf.figshare.com/articles/dataset/_/11842086)
Supplement: Supplementary file 1 [file 1]

Archive with 4 entries (4 files):
- ICBI_A_1726373_SuppTableS1.pdf
- ICBI_A_1726373_SuppTableS2.pdf
- ICBI_A_1726373_SuppTableS3.pdf
- ICBI_A_1726373_SuppTableS4.pdf
