# Supplementary material
Source: publisher figshare collection journal article supplement (https://tandf.figshare.com/articles/dataset/_/11842086)
Supplement: Supplementary file 1 [file 1 › ICBI_A_1726373_SuppTableS1.pdf]

| <b>Gene</b>  | <b>F Primer</b>              | <b>R Primer</b>             | <b>Accession No.</b> |
|--------------|------------------------------|-----------------------------|----------------------|
| <i>Bmal1</i> | 5'-ACGGATTCCTCTTTGTGGTG-3'   | 5'-TCCTTTGGGTGCAGGTAATC-3'  | MN049464             |
| <i>Clock</i> | 5'-AGCGTGACCTCCTTACTTGAAC-3' | 5'-ACTTTCCAACATCCGCGTAG-3'  | MN049466             |
| <i>Per2</i>  | 5'-AGTGGGACTGGAAAATGCTG-3'   | 5'-TGTGGTCTCAGCCAAGAGAAG-3' | MN049463             |
| <i>Cry2</i>  | 5'-AAAGCACACACGATGACACC-3'   | 5'-TTTCGCTCCAAGTGTCTGTC-3'  | MN049465             |
| <i>Actb</i>  | 5'-TTCACCACCACAGCTGAAAG-3'   | 5'-TGCTCAAAGTCCAGAGCAAC-3'  | MN049467             |

Suppl. Table S1: Sequences of the forward and reverse primers used for qPCR analysis.
