# Supplementary material
Source: publisher figshare collection journal article supplement (https://tandf.figshare.com/articles/dataset/_/11842086)
Supplement: Supplementary file 1 [file 1 › ICBI_A_1726373_SuppTableS2.pdf]

| <b>Tissue</b>       | <b>Gene</b>  | <b>Breeding phase</b>           | <b>Hibernating phase</b>         |
|---------------------|--------------|---------------------------------|----------------------------------|
| <b>Hypothalamus</b> | <i>Bmal1</i> | $F_{5,29} = 10.75, P < 0.0001$  | $F_{5,29} = 4.462, P = 0.0051$   |
|                     | <i>Clock</i> | $F_{5,29} = 11.75, P < 0.0001$  | $F_{5,29} = 11.27, P < 0.0001$   |
|                     | <i>Per2</i>  | $F_{5,29} = 4.273, P = 0.0045$  | $F_{5,29} = 12.32, P < 0.0001$   |
|                     | <i>Cry2</i>  | $F_{5,29} = 4.196, P = 0.0052$  | $F_{5,29} = 3.461, P = 0.0170$   |
| <b>Liver</b>        | <i>Bmal1</i> | $F_{5,329} = 11.03, P < 0.0001$ | $F_{5,329} = 0.8126, P = 0.5524$ |
|                     | <i>Clock</i> | $F_{5,29} = 10.03, P < 0.0001$  | $F_{5,29} = .6003, P = 0.7236$   |
|                     | <i>Per2</i>  | $F_{5,29} = 2.731, P = 0.0378$  | $F_{5,29} = 1.483, P = 0.2324$   |
|                     | <i>Cry2</i>  | $F_{5,29} = 5.303, P = 0.0013$  | $F_{5,29} = 1.210, P = 0.3344$   |

Suppl. Table S2: Values of 1-way ANOVA in hypothalamus and liver tissue during breeding and hibernating phase.
