# Supplementary material
Source: publisher figshare collection journal article supplement (https://tandf.figshare.com/articles/dataset/_/11842086)
Supplement: Supplementary file 1 [file 1 › ICBI_A_1726373_SuppTableS3.pdf]

| <b>Tissue</b>       | <b>Gene</b>         | <b>Habitat</b>                 | <b>Time</b>                    | <b>Interaction of habitat x time</b> |
|---------------------|---------------------|--------------------------------|--------------------------------|--------------------------------------|
| <b>Hypothalamus</b> | <b><i>Bmal1</i></b> | $F_{1,48} = 10.43, P = 0.0022$ | $F_{5,48} = 9.852, P < 0.0001$ | $F_{5,48} = 4.148, P = 0.0256$       |
|                     | <b><i>Clock</i></b> | $F_{1,48} = 10.43, P = 0.0022$ | $F_{5,48} = 9.852, P < 0.0001$ | $F_{5,48} = 2.148, P = 0.0756$       |
|                     | <b><i>Per2</i></b>  | $F_{1,48} = 4.093, P = 0.0486$ | $F_{5,48} = 3.059, P = 0.0178$ | $F_{5,48} = 10.05, P < 0.0001$       |
|                     | <b><i>Cry2</i></b>  | $F_{1,48} = 13.93, P = 0.0005$ | $F_{5,48} = 3.916, P = 0.0047$ | $F_{5,48} = 2.956, P = 0.0209$       |
| <b>Liver</b>        | <b><i>Bmal1</i></b> | $F_{1,48} = 9.031, P = 0.0042$ | $F_{5,48} = 3.851, P = 0.0052$ | $F_{5,48} = 6.099, P = 0.0002$       |
|                     | <b><i>Clock</i></b> | $F_{1,48} = 10.43, P = 0.0042$ | $F_{5,48} = 9.852, P < 0.0001$ | $F_{5,48} = 2.148, P = 0.0156$       |
|                     | <b><i>Per2</i></b>  | $F_{1,48} = 6.803, P = 0.0121$ | $F_{5,48} = 1.585, P = 0.1822$ | $F_{5,48} = 1.565, P = 0.1878$       |
|                     | <b><i>Cry2</i></b>  | $F_{1,48} = 3.455, P = 0.0047$ | $F_{5,48} = 2.591, P = 0.0374$ | $F_{5,48} = 3.411, P = 0.0102$       |

Suppl. Table S3: Values of two way ANOVA
