# Supplementary material
Source: publisher figshare collection journal article supplement (https://tandf.figshare.com/articles/dataset/_/11842086)
Supplement: Supplementary file 1 [file 1 › ICBI_A_1726373_SuppTableS4.pdf]

| Gene         | Tissue       | Life history state | Mesor | Amplitude | Acrophase |
|--------------|--------------|--------------------|-------|-----------|-----------|
| <i>Bmal1</i> | Hypothalamus | breeding           | 0.6   | 0.4       | 6.3       |
|              |              | hibernating        | 0.4   | 0.2       | 3.6       |
| <i>Clock</i> |              | breeding           | 0.8   | 0.5       | 9.6       |
|              |              | hibernating        | 0.6   | 0.8       | 4.6       |
| <i>Per2</i>  |              | breeding           | 1.4   | 0.5       | 20.4      |
|              |              | hibernating        | 1.0   | 0.8       | 5.7       |
| <i>Cry2</i>  |              | breeding           | 0.7   | 0.5       | 6         |
|              |              | hibernating        | 0.2   | 0.1       | 0.9       |
| <i>Bmal1</i> | Liver        | breeding           | 0.5   | 0.5       | 7.3       |
|              |              | hibernating        | -     | -         | -         |
| <i>Clock</i> |              | breeding           | 0.6   | 0.4       | 10.7      |
|              |              | hibernating        | -     | -         | -         |
| <i>Per3</i>  |              | breeding           | 0.3   | 0.2       | 1.2       |
|              |              | hibernating        | -     | -         | -         |
| <i>Cry2</i>  |              | breeding           | 0.4   | 0.4       | 4.2       |
|              |              | hibernating        | -     | -         | -         |

Suppl. Table S4: Parameters of cosinor rhythm in gene expressions in hypothalamus and liver tissues of terai tree frog during two different seasonal LHSs (breeding and hibernating phase) as determined by the cosinor analysis.
